# Supplementary material
Source: publisher figshare collection journal article supplement (https://gsapubs.figshare.com/articles/dataset/_/14829039)

Gannon, P.J., Smith, M.E., Umhoefer, P.J., and Leary, R.J., 2021, High-resolution late Paleozoic cyclostratigraphy and tectonic evolution of the Keeler Basin, California, southwest Laurentia: GSA Bulletin, <https://doi.org/10.1130/B36027.1>.

## Supplemental Material

**Figure S1.** Full resolution stratigraphic sections.

**Table S1.** Raw gamma and facies rank data.



Figure DR1. Full resolution stratigraphic sections

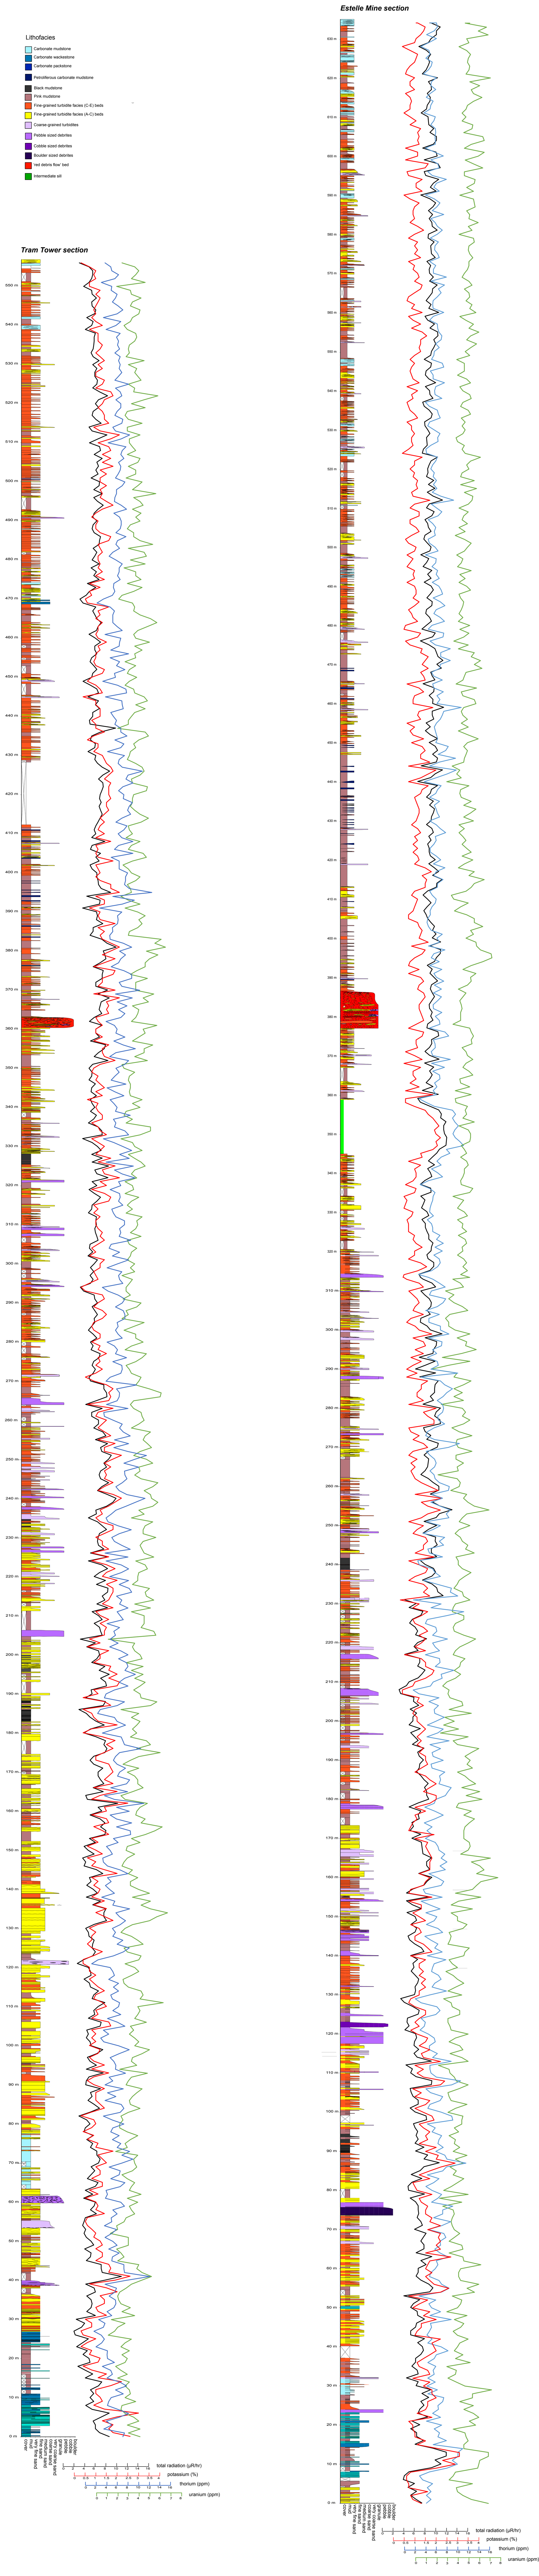

Supplement: Supplementary file 1 [file 1]
